# Supplementary material
Source: Springer Nature journal article supplement (https://www.springermedizin.de/resource/supplementary/12876_2012_807_MOESM5_ESM.pdf/9437554)
Supplement: MOESM5 [file 9437554]

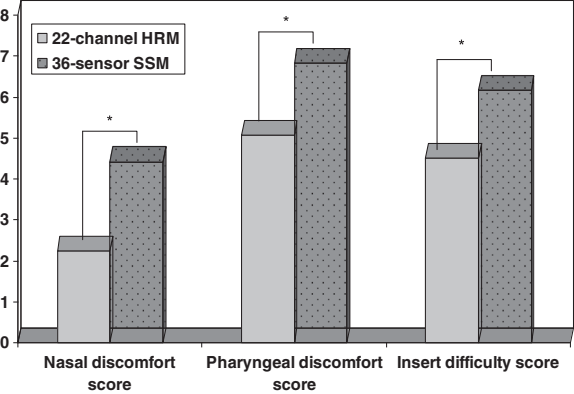

22-channel HRM  
36-sensor SSM

Nasal discomfort score

Pharyngeal discomfort score

Insert difficulty score
